# Supplementary material
Source: PubMed Central journal article supplement (PMC2206576)

**IFN- $\gamma$  effect size**

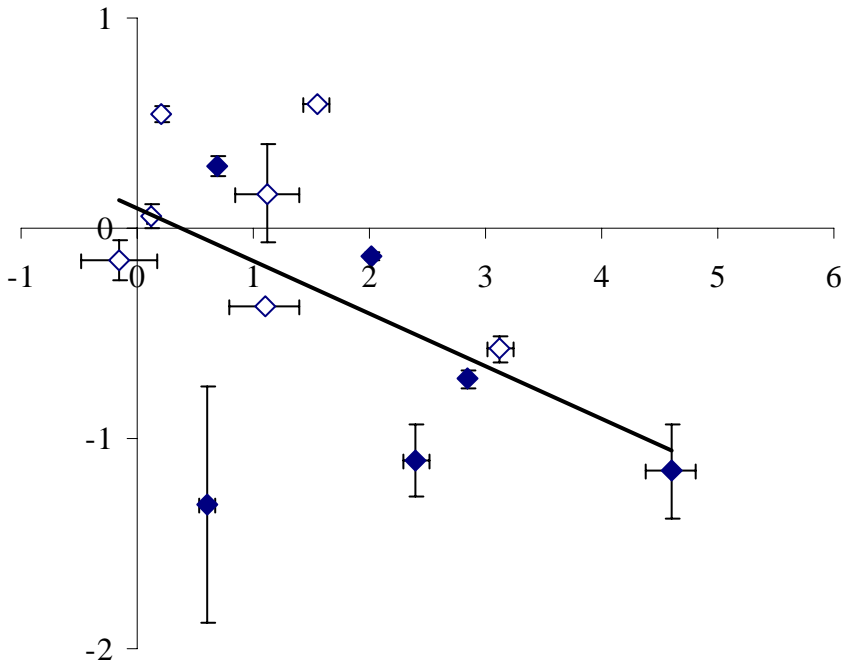

**IL-4 effect size**

Supplement: pnas_0707221105_1.pdf [file pnas_0707221105_1.pdf]
